# Supplementary material for: Identification of novel transcription factors regulating secondary cell wall formation in Arabidopsis
Source: Front Plant Sci. 2013 Jun 11;4:189. doi: 10.3389/fpls.2013.00189 (PMC3677987; doi:10.3389/fpls.2013.00189)
Supplement: Supplementary file 6 [file DataSheet6.XLSX]

## Sheet: S6_mutant_pdf 
Table S6. T-DNA or RNAi lines information for selected genes potentially involved in SCW formation
Gene	AGI	Annotation	T-DNA line(s) or RNAi line(s)a	T-DNA insertion	Data setsb
1	AT5G61590	AP2 TF	SALK_015182C	Exon	1, 2, 3
2	AT3G14230	AP2 TF RAP2.2	SAIL_799_D10	Exon	1, 2, 3, 4
			CATMA3a13510	RNAi
3	AT5G51190	AP2 TF	GABI_680C11	Exon	1, 2, 3
4	AT5G60450	ARF4	SALK_070506C	Exon	1, 2, 3
			SALK_023804C	Promotor
5	AT1G30330	ARF6	GK_286G04	Intron	2, 3, 4
6	AT5G54680	bHLH105	CATMA5a50510	RNAi	1, 2, 4
7	AT1G68810	bHLH30	CATMA1a58210	RNAi	1, 2, 3
8	AT3G25710	bHLH32	GABI_533B01	Exon	1, 2, 3
			CATMA3a25490	RNAi
9	AT5G46760	bHLH5	SALK_120763C	Exon	1, 2, 3, 4
			CATMA5a42770	RNAi
10	AT2G45880	BMYc	SALK_006926C	Promotor	4
11	AT2G18160	bZIP TF	SAIL_1163_E05	Exon	1, 2
12	AT2G44840	AP2 TF ERF	GABI_121A12	Exon	1, 4, 3
13	AT5G07580	AP2 TF ERF	SALK_097771C	Exon	2, 3
14	AT1G52150	HB15/CNA	SALK_017186	Intron	2, 4
			SALK_140350C	Promotor
			SAIL_274_087	UTR5
15	AT5G65310	HB5	SALK_015070C	Exon	1, 3
			SALK_078602	Exon	1, 3
			SALK_134509C	Exon	1, 3
16	AT4G34610	Homeodomain TF (BLH6)	SALK_011023C	Exon	1, 2, 3
			SALK_069450C	Exon
17	AT4G28640	IAA11	CATMA4a30295	RNAi	1, 2, 3
18	AT5G25890	IAA28	SALK_129988C	UTR5	2, 3
19	AT3G20810	jumonji TF	GK_454C10	Exon	1, 2, 3
20	AT1G01060	myb TF _n149	SALK_149287	Exon	1, 2, 4
21	AT3G11280	myb TF_25	SALK_025629	Exon	1, 3
			SALK_004053C	Exon
			SALK_021025C	Exon
22	AT1G63910	MYB103	GABI_361D06	Exon	1, 3
23	AT1G66230	MYB20	GABI_109C11	Exon	1
24	At5G26660	Myb86	SALK_016998C	Exon	3
			SALK_143117C	Exon
			SALK_048405C	UTR5
25	At5G12870	Myb46	SALK_088514C	Intron	1, 2, 3
			SALK_100993C	Intron
26	AT1G17950	MYB52	SALK_138624	Exon	1, 2, 3
			SALK_118938	Intron
27	AT5G59780	MYB59	GABI_627C09	Exon	1, 2, 3
28	AT4G22680	MYB85	SALK_052334	Exon	1, 2, 3
29	AT5G63790	NAC102	SALK_030702C	Exon	4
30	AT1G12260	NAC007, VND4	SALK_145159C	Intron	1
31	AT1G50420	scarecrow-like3 TF	SALK_002516C	Exon	1
32	AT2G44745	WRKY12	GABI_375B03	Exon	1, 2, 3
33	AT2G30250	WRKY25	WiscDsLox359A09	Exon	1, 2, 3
34	AT2G30250	WRKY25	CATMA2a28530	RNAi	1, 2, 3
35	AT4G23550	WRKY29	GABI_793H12	Exon	1, 2, 3
36	AT1G80840	WRKY40	CATMA1a70060	RNAi	1, 4
37	AT1G07360	zinc finger TF	SALK_142085C	Intron	4
38	AT1G68200	zinc finger TF	SALK_045897	Exon	4
39	AT1G72220	zinc finger TF	SALK_072357	Exon	1
40	AT3G46620	zinc finger TF	SALK_129323C	Exon	1, 4
			SALK_061038	Exon
41	AT3G47500	zinc finger TF	SAIL_434_G09	Exon	4
42	AT3G55980	zinc finger TF	SALK_141550	Exon	1, 4
			SAIL_191_G05	Exon
43	AT4G24060	zinc finger TF	SALK_152104	Exon	1, 4
			SALK_039188	UTR5
aAll T-DNA insertion lines are in Col-0 backgroud, except WiscDsLox359A09 in col-2 background. All RNAi lines are in col-9 background. bThe respective transcriptome data sets of wat1 vs wt (1), over-expressing EgMYB2 vs. Wt (2), over-expressing EgMYB1 vs. WT (3), and Arabidopsis orthologs of Eucalyptus genes which are preferentially expressed in xylem (4). CEncodes a beta-amylase-like protein pre…
