# Supplementary material for: Identification of novel transcription factors regulating secondary cell wall formation in Arabidopsis
Source: Front Plant Sci. 2013 Jun 11;4:189. doi: 10.3389/fpls.2013.00189 (PMC3677987; doi:10.3389/fpls.2013.00189)
Supplement: Supplementary file 8 [file DataSheet8.XLSX]

## Sheet: S8_MYB_025
Table S8. Top 50 co-expressed genes with MYB-like TF using Genevestigator platform
Probeset	AGI	Gene Symbol	Score	Description
256255_at	AT3G11280		1	putative MYB domain containing transcription factor
247357_at	AT5G63710		0.8843	Leucine-rich repeat protein kinase family protein
247696_at	AT5G59780	MYB59	0.8712	myb domain protein 59
248590_at	AT5G49660	XIP1	0.855	XYLEM INTERMIXED WITH PHLOEM 1
265357_at	AT2G16740	UBC29	0.8333	ubiquitin-conjugating enzyme 29
267127_at	AT2G23610	MES3	0.8322	methyl esterase 3
245891_at	AT5G09220	AAP2	0.8284	amino acid permease 2
265034_at	AT1G61660		0.8191	basic helix-loop-helix (bHLH) DNA-binding superfamily protein
255645_at	AT4G00880		0.8171	SAUR-like auxin-responsive protein family
245090_at	AT2G40900		0.8067	nodulin MtN21 /EamA-like transporter family protein
246591_at	AT5G14880		0.8055	Potassium transporter family protein
261456_at	AT1G21050		0.8016	Protein of unknown function, DUF617
248263_at	AT5G53370	PMEPCRF	0.7996	pectin methylesterase PCR fragment F
263632_at	AT2G04795		0.797	unknown protein
250582_at	AT5G07580		0.7936	Integrase-type DNA-binding superfamily protein
262396_at	AT1G49470		0.7852	Family of unknown function (DUF716)
254551_at	AT4G19840	PP2-A1	0.7838	phloem protein 2-A1
247540_at	AT5G61590		0.7722	Integrase-type DNA-binding superfamily protein
247549_at	AT5G61420	MYB28,PMG1,HAG1	0.7683	myb domain protein 28
250764_at	AT5G05960		0.7678	Bifunctional inhibitor/lipid-transfer protein/seed storage 2S albumin superfamily protein
261970_at	AT1G65960	GAD2	0.7662	glutamate decarboxylase 2
253812_at	AT4G28240		0.766	Wound-responsive family protein
261224_at	AT1G20160	ATSBT5.2	0.7654	Subtilisin-like serine endopeptidase family protein
266216_at	AT2G28810		0.7635	Dof-type zinc finger DNA-binding family protein
251968_at	AT3G53100		0.7626	GDSL-like Lipase/Acylhydrolase superfamily protein
253474_at	AT4G32270		0.7611	Ubiquitin-like superfamily protein
260753_at	AT1G49230		0.7609	RING/U-box superfamily protein
251006_at	AT5G02600	NPCC6,NAKR1	0.7598	Heavy metal transport/detoxification superfamily protein
252282_at	AT3G49360	PGL2	0.7591	6-phosphogluconolactonase 2
266326_at	AT2G46650	B5,CB5-C	0.7557	cytochrome B5 isoform C
257715_at	AT3G12750	ZIP1	0.7554	zinc transporter 1 precursor
260385_at	AT1G74090	SOT18,ATST5B	0.7554	desulfo-glucosinolate sulfotransferase 18
267126_s_at	AT2G23590,AT2G23600	ME8,MES2,MES8,ACL	0.7545	[AT2G23600, acetone-cyanohydrin lyase];[AT2G23590, methyl esterase 8]
257375_at	AT2G38640		0.7512	Protein of unknown function (DUF567)
254862_at	AT4G12030	BASS5,BAT5	0.7489	bile acid transporter 5
247440_at	AT5G62680		0.7476	Major facilitator superfamily protein
262951_at	AT1G75500	WAT1	0.7469	Walls Are Thin 1
253746_at	AT4G29100		0.7459	basic helix-loop-helix (bHLH) DNA-binding superfamily protein
258038_at	AT3G21260	GLTP3	0.7443	Glycolipid transfer protein (GLTP) family protein
252534_at	AT3G46130	MYB48	0.7416	myb domain protein 48
252419_at	AT3G47510		0.7415	unknown protein
252425_at	AT3G47620	TCP14	0.7412	TEOSINTE BRANCHED, cycloidea and PCF (TCP) 14
261409_at	AT1G07640	OBP2	0.7411	Dof-type zinc finger DNA-binding family protein
264052_at	AT2G22330	CYP79B3	0.7385	cytochrome P450, family 79, subfamily B, polypeptide 3
255578_at	AT4G01450		0.7384	nodulin MtN21 /EamA-like transporter family protein
249231_at	AT5G42030	ABIL4	0.7379	ABL interactor-like protein 4
252612_at	AT3G45160		0.7374	Putative membrane lipoprotein
267461_at	AT2G33830		0.7358	Dormancy/auxin associated family protein
266809_at	AT2G29970		0.7356	Double Clp-N motif-containing P-loop nucleoside triphosphate hydrolases superfamily protein
255951_at	AT1G22050	MUB6	0.7346	membrane-anchored ubiquitin-fold protein 6 precursor
264204_at	AT1G22710	SUC2,SUT1	0.7341	sucrose-proton symporter 2
